# Supplementary material for: Haematococcus lacustris Carotenogensis: A Historical Event of Primary to Secondary Adaptations to Earth’s Oxygenation
Source: MDPI journal article supplement (doi:10.3390/life14050576), 2024-04-30
Supplement: s1 [file s1]

## Supplementary Figures

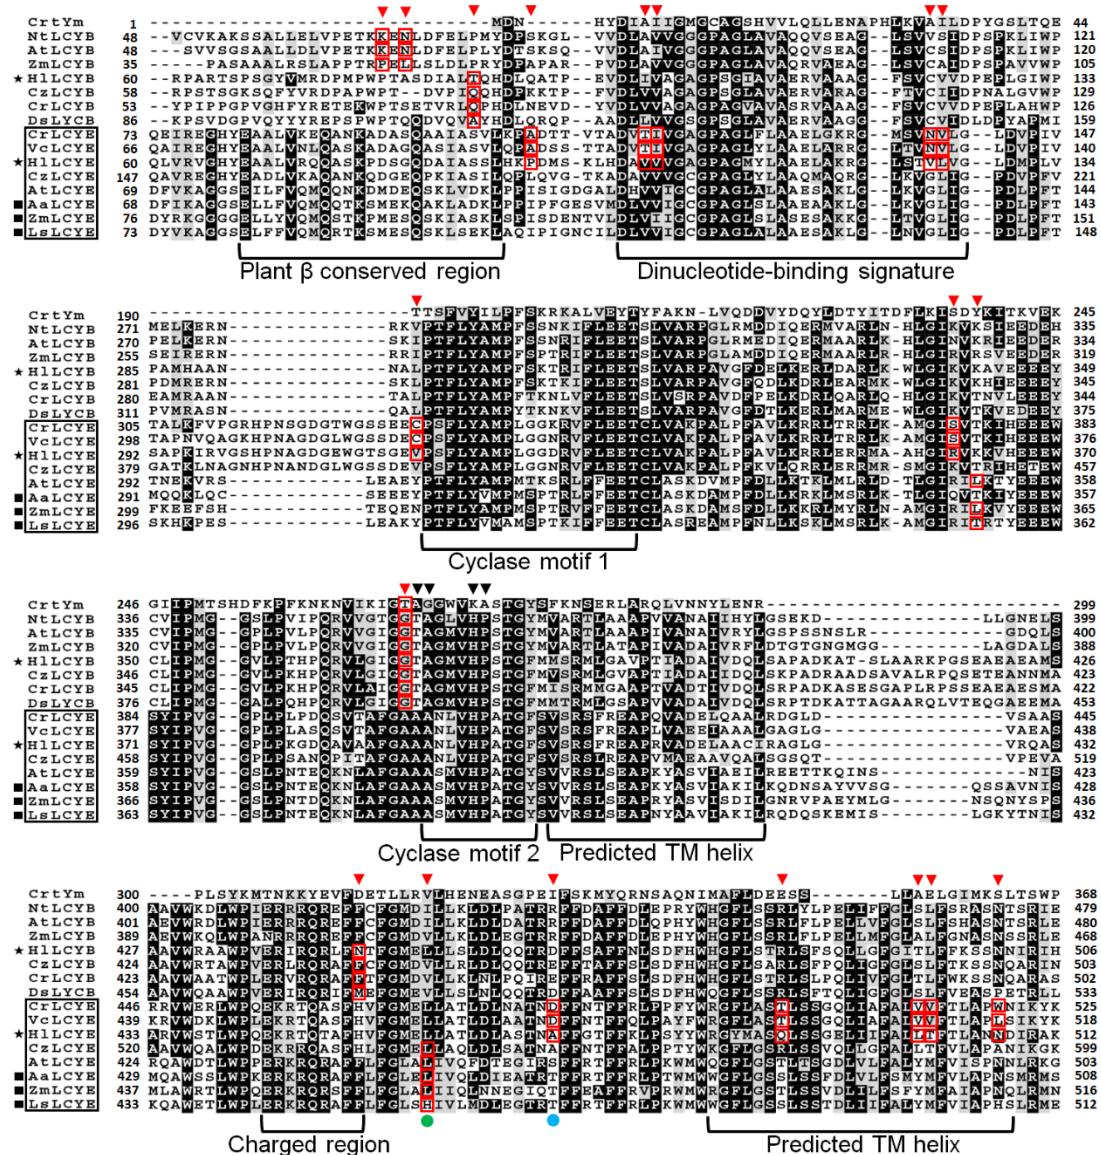

**Figure S1.** Multiple secondary domains in cyclases. The regulatory motif conserved in all  $\beta$ -bicyclases are highlighted by black arrowheads. Some positively selected sites are red-boxed and indicated by red arrowheads. The two residues varying between  $\epsilon$ -mono- and bicyclases are highlighted by filled circles. Filled rectangle indicated three  $\epsilon$ -bicyclases. Stars indicate the HILCYE and HILCYB characterized in this study.

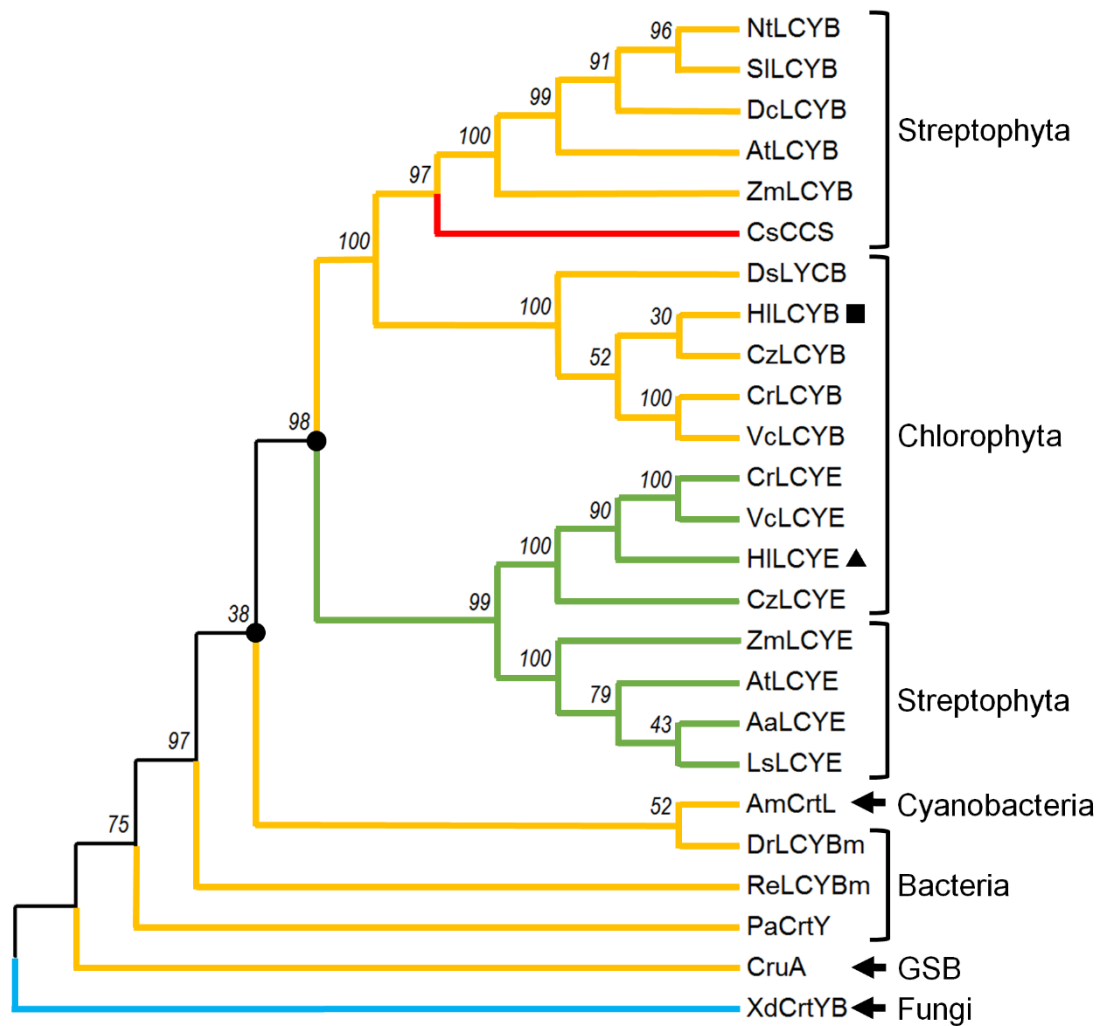

**Figure S2.** Molecular evolutionary relationships of the *H. lacustris* cyclases by the Neighbor-Joining method. The orange, green, red, and blue lines highlight LCYBs, LCYEs, CCS, and fungal bi-functional cyclase, respectively. The nodes of gene duplication during evolution are dotted. The bootstrap consensus tree inferred from 1000 replicates is taken to represent the evolutionary history of the taxa analyzed. Branches corresponding to partitions reproduced in less than 50% bootstrap replicates are collapsed. The percentage of replicate trees in which the associated taxa clustered together in the bootstrap test (1000 replicates) are shown above the branches.

## Supplementary Tables

**Table S1.** Primers used in this study.

| Manipulation                           | Primer                   | Sequence (5' to 3')                                                           |
|----------------------------------------|--------------------------|-------------------------------------------------------------------------------|
| <b>Expression plasmid construction</b> |                          |                                                                               |
| pACCRT-                                | EIBYb F                  | <u>TACCGCATTA<b>AAGCTT</b></u> aggaggattacaaa <b>ATG</b> TTGAGCAAACAACACGATT  |
| EIB-B                                  | EIBYb R                  | <u>TATCATCGATA<b>AAGCTT</b></u> CTACTTGATCATGGCTGGCG                          |
| pACCRT-                                | EIBYe F                  | <u>TACCGCATTA<b>AAGCTT</b></u> aggaggattacaaa <b>ATG</b> CAACCACTGCGTGTAGCAAC |
| EIB-E                                  | EIBYe R                  | <u>TATCATCGATA<b>AAGCTT</b></u> TTAGGCCTGGTTCGGCTCCA                          |
| <b>Site-directed mutagenesis</b>       |                          |                                                                               |
| LCYE mutants                           | SP <sup>b</sup>          | CCACTGGCAG <b>ACTAGT</b> GTAACAGGATTAGC                                       |
|                                        | L457H                    | ATCCAGAGTGCCAG <b>ATG</b> CTCCATGCCAAATAC                                     |
|                                        | A498S                    | AGTGAAAGTCAGCAG <b>GCT</b> GAAGATGATCAGCTC                                    |
|                                        | L457H/A498S <sup>c</sup> | AGTGAAAGTCAGCAG <b>GCT</b> GAAGATGATCAGCTC                                    |
|                                        | TAGX3KA                  | CATGAACCCTGTTGA <b>GGCCTT</b> CACCATGCC <b>GCCGCGCGT</b> GCCAATGCCCAGCAC      |
|                                        | G370T                    | CACCATGCCCCGCCGT <b>GCT</b> GCCAATGCCCAGCAC                                   |
| LCYB mutants                           | T371A                    | ATGCACCATGCCCGC <b>CGC</b> GCCGCCAATGCCCAG                                    |
|                                        | A372G                    | GGGATGCACCATGCC <b>GCC</b> CGTGCCGCCAATGCC                                    |
|                                        | T371A/A372G <sup>c</sup> | GGGATGCACCATGCC <b>GCC</b> CGTGCCGCCAATGCC                                    |
|                                        | H376K                    | GAACCCTGTTGAGGG <b>CTT</b> CACCATGCCCGCCGT                                    |
|                                        | P377A                    | CATGAACCCTGTTGA <b>GGC</b> ATGCACCATGCCCGC                                    |
|                                        | H376K/P377A <sup>3</sup> | CATGAACCCTGTTGA <b>GGC</b> ATGCACCATGCCCGC                                    |

Sequences overlapping those of vectors are underlined; restriction sites are shown in bold italics; initiation codon (ATG) artificially added is shown in bold; mutant sites are shown in red. The selection primer (SP) was designed according to the user protocol.

**Table S2.** Sequences used for sequence alignment and molecular evolution analyses.

| Type                           | Species                              | Accession number      |
|--------------------------------|--------------------------------------|-----------------------|
| Streptophyta LCYB              | <i>Nicotiana tabacum</i>             | NP_001311716          |
|                                | <i>Arabidopsis thaliana</i>          | AAB53337              |
|                                | <i>Zea mays</i>                      | AAO18661              |
|                                | <i>Solanum lycopersicum</i>          | ABR57232              |
|                                | <i>Daucus carota</i>                 | NP_001316089          |
| Chlorophyta LCYB               | <i>Haematococcus lacustris</i>       | KX424526 (this study) |
|                                | <i>Chlamydomonas reinhardtii</i>     | AAX54906              |
|                                | <i>Chromochloris zofingiensis</i>    | CBH31263              |
|                                | <i>Dunaliella salina</i>             | ACA34344              |
|                                | <i>Volvox carteri f. nagariensis</i> | EFJ41647              |
| Streptophyta LCYE              | <i>Arabidopsis thaliana</i>          | AAB53336              |
|                                | <i>Adonis aestivalis</i>             | AAK07431              |
|                                | <i>Zea mays</i>                      | NP_001146840          |
|                                | <i>Lactuca sativa</i>                | AAK07434              |
| Chlorophyta LCYE               | <i>Chlamydomonas reinhardtii</i>     | XP_001696529          |
|                                | <i>Volvox carteri f. nagariensis</i> | XP_002945935          |
|                                | <i>Haematococcus lacustris</i>       | AKT95178 (this study) |
|                                | <i>Chromochloris zofingiensis</i>    | CCG06343              |
| Bacterial $\beta$ -monocyclase | Unclassified <i>Flavobacterium</i>   | BAC77673              |
|                                | <i>Rhodococcus erythropolis</i>      | AAR98749              |
|                                | <i>Deinococcus radiodurans</i>       | AAF10377              |
| Cyanobacterial CrtL            | <i>Acaryochloris marina</i>          | WP_012166204          |
| Eubacterial CrtY               | <i>Pantoea ananatis</i>              | ADD79327              |
| Fungal CrtB                    | <i>Xanthophyllomyces dendrorhous</i> | AAY33923              |
| Streptophyta CCS               | <i>Citrus sinensis</i>               | AAF18389              |
| GSB CruA                       | <i>Chlorobium tepidum</i>            | NP_661357.1           |

CCS: capsanthin-capsorubin synthase

**Table S3.** Product profiles of the *H. lacustris* cyclases and site-directed mutants expressed in *E. coli*.

| Percentage of total carotenoids (n = 3)   |             |            |           |           |       |           |      |          |          |
|-------------------------------------------|-------------|------------|-----------|-----------|-------|-----------|------|----------|----------|
|                                           | lyc         | δ-car      | γ-car     | ε-car     | α-car | β-car     | neur | α-zeacar | β-zeacar |
| EIB-E                                     | 67.89 ± 2   | 32.11 ± 3  | n.d.      | n.d.      | n.d.  | n.d.      | n.d. | n.d.     | n.d.     |
| EIB-B                                     | 1.08 ± 1    | n.d.       | n.d.      | n.d.      | n.d.  | 98.92 ± 4 | n.d. | n.d.     | n.d.     |
| <b>Mutants of HILCYE</b>                  |             |            |           |           |       |           |      |          |          |
| L457H                                     | 66.52 ± 0.5 | n.d.       | n.d.      | 33.48 ± 2 | n.d.  | n.d.      | n.d. | n.d.     | n.d.     |
| A468D                                     | 87.7 ± 3    | 12.3 ± 1   | n.d.      | n.d.      | n.d.  | n.d.      | n.d. | n.d.     | n.d.     |
| V531T                                     | 99.83 ± 2   | 0.17 ± 0.1 | n.d.      | n.d.      | n.d.  | n.d.      | n.d. | n.d.     | n.d.     |
| <b>Mutants of HILCYB</b>                  |             |            |           |           |       |           |      |          |          |
| G370T                                     | 2.22 ± 0.5  | n.d.       | n.d.      | n.d.      | n.d.  | 97.78 ± 4 | n.d. | n.d.     | n.d.     |
| T371A                                     | 1.24 ± 0.5  | n.d.       | n.d.      | n.d.      | n.d.  | 98.76 ± 2 | n.d. | n.d.     | n.d.     |
| A372G                                     | 1.27 ± 0.2  | n.d.       | n.d.      | n.d.      | n.d.  | 98.73 ± 2 | n.d. | n.d.     | n.d.     |
| H376K                                     | 1.21 ± 0.3  | n.d.       | n.d.      | n.d.      | n.d.  | 98.79 ± 1 | n.d. | n.d.     | n.d.     |
| P377A                                     | 1.19 ± 0.5  | n.d.       | n.d.      | n.d.      | n.d.  | 98.81 ± 3 | n.d. | n.d.     | n.d.     |
| T371A/A372G                               | 1.39 ± 1    | n.d.       | n.d.      | n.d.      | n.d.  | 98.61 ± 1 | n.d. | n.d.     | n.d.     |
| H376K/P377A                               | 2.87 ± 1    | n.d.       | n.d.      | n.d.      | n.d.  | 97.13 ± 1 | n.d. | n.d.     | n.d.     |
| G370T/H376K/P377A                         | 21.91 ± 1   | n.d.       | 3.57 ± 1  | n.d.      | n.d.  | 74.52 ± 2 | n.d. | n.d.     | n.d.     |
| GTAX <sub>3</sub> HP/TAGX <sub>3</sub> KA | 53.57 ± 3   | n.d.       | 14.94 ± 2 | n.d.      | n.d.  | 31.49 ± 2 | n.d. | n.d.     | n.d.     |

Data are expressed as dry cell weight (DCW) percentages of total carotenoids in the *E. coli* strains, and each value is the mean ± SD for three experiments (n = 3). Lyc: lycopene; δ-car: δ-carotene; γ-car: γ-carotene; ε-car: ε-carotene; α-car: α-carotene; β-car: β-carotene; neur: neurosporene; α-zeacar: α-zeacarotene; β-zeacar: β-zeacarotene; n.d.: not detected.

**Table S4.** Recombination analysis of cyclases

| Recombinant | Breakpoint |      | Parent |               | Detection Methods |           |          |          |          |          |         |          |      |
|-------------|------------|------|--------|---------------|-------------------|-----------|----------|----------|----------|----------|---------|----------|------|
|             | Begin      | End  | Minor  | Major         | RDP               | GENECONV  | Bootscan | Maxchi   | Chimaera | SiScan   | PhylPro | LARD     | 3Seq |
| ZmLCYB      | 1031       | 1365 | AtLCYB | CrLCYB/VcLCYB | NS                | 0.0007797 | NS       | 2.06E-02 | 1.65E-02 | 1.44E-09 | NS      | 2.91E-02 | NS   |

NS: No significant *P* value is recorded for this recombination event using this method.

**Table S5.** LRT of the models used in the PAML analysis

| Model                     | np | Estimates of parameters                                                                                                                                                                                          | lnL               | LRT pair | df | 2ΔlnL       | Positive selected sites |
|---------------------------|----|------------------------------------------------------------------------------------------------------------------------------------------------------------------------------------------------------------------|-------------------|----------|----|-------------|-------------------------|
| <b>Site models</b>        |    |                                                                                                                                                                                                                  |                   |          |    |             |                         |
| M0                        | 49 | $\omega=0.07152$                                                                                                                                                                                                 | -<br>33663.366682 |          |    |             |                         |
| M3                        | 53 | $p_0=0.38470, p_1=0.44096,$<br>$(p_2=0.17434), \omega_0=0.01935,$<br>$\omega_1=0.09159, \omega_2=0.29940$                                                                                                        | -<br>32903.382604 | M0/M3    | 4  | 1519.9700** |                         |
| M1a                       | 50 | $p_0=0.86750, (p_1=0.13250),$<br>$\omega_0=0.07646, (\omega_1=1.00000)$                                                                                                                                          | -<br>33424.440636 |          |    |             |                         |
| M2a                       | 52 | $p_0=0.86750, p_1=0.01616,$<br>$(p_2=0.11635), \omega_0=0.07646,$<br>$(\omega_1=1.00000), \omega_2=1.00000$                                                                                                      | -<br>33424.440636 | M1a/M2a  | 2  | 0           |                         |
| M7                        | 50 | $p=1.12383, q=9.31286$<br>$p_0=0.99027, p=1.15604,$<br>$q=9.95730, (p_1=0.00973),$<br>$\omega=1.00000$                                                                                                           | -<br>32906.043654 |          |    |             |                         |
| M8                        | 52 |                                                                                                                                                                                                                  | -<br>32904.834280 | M7/M8    | 2  | 2.4188      |                         |
| <b>Branch models</b>      |    |                                                                                                                                                                                                                  |                   |          |    |             |                         |
| Fr                        | 95 | See Figure 4                                                                                                                                                                                                     | -<br>33550.427866 | M0/Fr    | 46 | 225.8780**  |                         |
| Ta                        | 50 | $\omega_0=0.07145, \omega_a=447.95515$                                                                                                                                                                           | -<br>33663.294828 | M0/Ta    | 1  | 0.1437      |                         |
| Tb                        | 50 | $\omega_0=0.07145, \omega_b=3.41633$                                                                                                                                                                             | -<br>33660.058438 | M0/Tb    | 1  | 6.6165**    |                         |
| Tc                        | 50 | $\omega_0=0.07152, \omega_c=287.71757$                                                                                                                                                                           | -<br>33663.291103 | M0/Tc    | 1  | 0.1512      |                         |
| Td                        | 50 | $\omega_0=0.07161, \omega_d=999.00000$                                                                                                                                                                           | -<br>33662.259393 | M0/Td    | 1  | 2.2146      |                         |
| Te                        | 50 | $\omega_0=0.07206, \omega_e=0.00184$                                                                                                                                                                             | -<br>33662.761843 | M0/Te    | 1  | 1.2097      |                         |
| Tf                        | 50 | $\omega_0=0.07700, \omega_f=0.00587$                                                                                                                                                                             | -<br>33653.210680 | M0/Tf    | 1  | 20.3120**   |                         |
| Tg                        | 50 | $\omega_0=0.07216, \omega_g=999.00000$                                                                                                                                                                           | -<br>33660.221006 | M0/Tg    | 1  | 6.2914**    |                         |
| Th                        | 50 | $\omega_0=0.07112, \omega_h=999.00000$                                                                                                                                                                           | -<br>33660.722873 | M0/Th    | 1  | 5.2876*     |                         |
| Ti                        | 50 | $\omega_0=0.06958, \omega_i=999.00000$                                                                                                                                                                           | -<br>33657.758291 | M0/Ti    | 1  | 11.2168**   |                         |
| <b>Branch-site models</b> |    |                                                                                                                                                                                                                  |                   |          |    |             |                         |
| A1b                       | 51 | $p_0=0.68674, p_1=0.10482,$<br>$(p_{2a}=0.18083, p_{2b}=0.02760),$<br>$\omega_0=0.07585, (\omega_1=1.00000), b:$<br>$\omega_{2a}=0.07585, \omega_{2b}=1.00000, f:$<br>$\omega_{2a}=1.00000, \omega_{2b}=1.00000$ | -<br>33418.029102 |          |    |             |                         |

|     |    |                                                                                                                                                                                                                                                                                                                                                                                                                                                                                                                                                                    |   |              |        |   |           |                                                                                                                                                                                                                                                                                                                       |                                                                                                                                                                                                                                                                                                   |                                                                                                                                                                   |
|-----|----|--------------------------------------------------------------------------------------------------------------------------------------------------------------------------------------------------------------------------------------------------------------------------------------------------------------------------------------------------------------------------------------------------------------------------------------------------------------------------------------------------------------------------------------------------------------------|---|--------------|--------|---|-----------|-----------------------------------------------------------------------------------------------------------------------------------------------------------------------------------------------------------------------------------------------------------------------------------------------------------------------|---------------------------------------------------------------------------------------------------------------------------------------------------------------------------------------------------------------------------------------------------------------------------------------------------|-------------------------------------------------------------------------------------------------------------------------------------------------------------------|
|     |    | <p>p<sub>0</sub>=0.66662, p<sub>1</sub>=0.10212,<br/>(p<sub>2a</sub>=0.20054, p<sub>2b</sub>=0.03072),<br/>ω<sub>0</sub>=0.07672, (ω<sub>1</sub>=1.00000), b:<br/>ω<sub>2a</sub>=0.07672, ω<sub>2b</sub>=1.00000, f:<br/><b>ω<sub>2a</sub>=921.69928, ω<sub>2b</sub>=921.69928</b></p> <p>p<sub>0</sub>=0.82918, p<sub>1</sub>=0.12680,<br/>(p<sub>2a</sub>=0.03818, p<sub>2b</sub>=0.00584),<br/>ω<sub>0</sub>=0.07576, (ω<sub>1</sub>=1.00000), b:<br/>ω<sub>2a</sub>=0.07576, ω<sub>2b</sub>=1.00000, f:<br/>ω<sub>2a</sub>=1.00000, ω<sub>2b</sub>=1.00000</p> | - | 33412.910439 | A1b/Ab | 1 | 10.2373** | HILCYE<br>S89*, Y112*, K119*, G128*, D130*,<br>P132*, V134**, K145*, H151*, S180*,<br>V209**, <b>A210*</b> , T216*, A228*, T232**,<br>L233*, A235*, A237*, P250*, S254*,<br>E261*, F271**, T286*, K339*, H366*,<br>Y372*, V375*, G382*, D383**, A391*,<br>S403*, <b>L457*</b> , A459*, S465*, <b>A468*</b> ,<br>A498* | HILCYB<br><b>T86*</b> , A109*, A116*, D125*, E127*, I131*, P133**, E144*, E191*, D181*, V208**,<br>N209*, S215*, G227*, L231**, D232*, T234*, H236*, F247*, Y251*, V258*, F266**,<br>T281*, R318*, E345*, L351*, M354*, H361*, P362**, <b>G370*</b> , M382*, L451*, L453*,<br>Q459*, D462*, G492* |                                                                                                                                                                   |
| Ab  | 52 |                                                                                                                                                                                                                                                                                                                                                                                                                                                                                                                                                                    |   |              |        |   |           |                                                                                                                                                                                                                                                                                                                       |                                                                                                                                                                                                                                                                                                   |                                                                                                                                                                   |
| A1f | 51 |                                                                                                                                                                                                                                                                                                                                                                                                                                                                                                                                                                    | - | 33422.509336 |        |   |           |                                                                                                                                                                                                                                                                                                                       |                                                                                                                                                                                                                                                                                                   |                                                                                                                                                                   |
|     |    | <p>p<sub>0</sub>=0.83668, p<sub>1</sub>=0.12892,<br/>(p<sub>2a</sub>=0.02981, p<sub>2b</sub>=0.00459),<br/>ω<sub>0</sub>=0.07596, (ω<sub>1</sub>=1.00000), b:<br/>ω<sub>2a</sub>=0.07596, ω<sub>2b</sub>=1.00000, f:<br/><b>ω<sub>2a</sub>=21.31733, ω<sub>2b</sub>=21.31733</b></p> <p>p<sub>0</sub>=0.53134, p<sub>1</sub>=0.08186,<br/>(p<sub>2a</sub>=0.33516, p<sub>2b</sub>=0.05163),<br/>ω<sub>0</sub>=0.07470, (ω<sub>1</sub>=1.00000), b:<br/>ω<sub>2a</sub>=0.07470, ω<sub>2b</sub>=1.00000, f:<br/>ω<sub>2a</sub>=1.00000, ω<sub>2b</sub>=1.00000</p>   | - | 33417.738928 | A1f/Af | 1 | 9.5408*   | AtLCYB<br>K65**, N67*, N494*                                                                                                                                                                                                                                                                                          |                                                                                                                                                                                                                                                                                                   |                                                                                                                                                                   |
| Af  | 52 |                                                                                                                                                                                                                                                                                                                                                                                                                                                                                                                                                                    |   |              |        |   |           |                                                                                                                                                                                                                                                                                                                       |                                                                                                                                                                                                                                                                                                   |                                                                                                                                                                   |
| A1g | 51 |                                                                                                                                                                                                                                                                                                                                                                                                                                                                                                                                                                    | - | 33416.077226 |        |   |           |                                                                                                                                                                                                                                                                                                                       |                                                                                                                                                                                                                                                                                                   |                                                                                                                                                                   |
|     |    | <p>p<sub>0</sub>=0.81800, p<sub>1</sub>=0.12905,<br/>(p<sub>2a</sub>=0.04574, p<sub>2b</sub>=0.00722),<br/>ω<sub>0</sub>=0.07527, (ω<sub>1</sub>=1.00000), b:<br/>ω<sub>2a</sub>=0.07527, ω<sub>2b</sub>=1.00000, f:<br/><b>ω<sub>2a</sub>=999.00000, ω<sub>2b</sub>=999.00000</b></p> <p>p<sub>0</sub>=0.74005, p<sub>1</sub>=0.11651,<br/>(p<sub>2a</sub>=0.12393, p<sub>2b</sub>=0.01951),<br/>ω<sub>0</sub>=0.07480, (ω<sub>1</sub>=1.00000), b:<br/>ω<sub>2a</sub>=0.07480, ω<sub>2b</sub>=1.00000, f:<br/>ω<sub>2a</sub>=1.00000, ω<sub>2b</sub>=1.00000</p> | - | 33406.684493 | A1g/Ag | 1 | 18.7855** | HILCYB<br><b>T86**</b> , K242*, Q245*, N445*                                                                                                                                                                                                                                                                          | DsLCYB<br>A112**, K268*, Q271*, M472*                                                                                                                                                                                                                                                             |                                                                                                                                                                   |
| Ag  | 52 |                                                                                                                                                                                                                                                                                                                                                                                                                                                                                                                                                                    |   |              |        |   |           |                                                                                                                                                                                                                                                                                                                       |                                                                                                                                                                                                                                                                                                   |                                                                                                                                                                   |
| A1h | 51 |                                                                                                                                                                                                                                                                                                                                                                                                                                                                                                                                                                    | - | 33410.003873 |        |   |           |                                                                                                                                                                                                                                                                                                                       |                                                                                                                                                                                                                                                                                                   |                                                                                                                                                                   |
|     |    | <p>p<sub>0</sub>=0.79428, p<sub>1</sub>=0.13049,<br/>(p<sub>2a</sub>=0.06461, p<sub>2b</sub>=0.01062),<br/>ω<sub>0</sub>=0.07616, (ω<sub>1</sub>=1.00000), b:<br/>ω<sub>2a</sub>=0.07616, ω<sub>2b</sub>=1.00000, f:<br/><b>ω<sub>2a</sub>=999.00000, ω<sub>2b</sub>=999.00000</b></p> <p>p<sub>0</sub>=0.57455, p<sub>1</sub>=0.08544,<br/>(p<sub>2a</sub>=0.29600, p<sub>2b</sub>=0.04401),<br/>ω<sub>0</sub>=0.07413, (ω<sub>1</sub>=1.00000), b:<br/>ω<sub>2a</sub>=0.07413, ω<sub>2b</sub>=1.00000, f:<br/>ω<sub>2a</sub>=1.00000, ω<sub>2b</sub>=1.00000</p> | - | 33388.535879 | A1h/Ah | 1 | 42.9360*  | HILCYE<br>P93*, V102**, V103*, V125**, L126**,<br>A198*, L200**, <b>A210*</b> , L226**, V231**,<br>S251*, V315**, R361**, <b>A468**</b> , Q488*,<br>L500*, T501**, N507**, V531**                                                                                                                                     | CrLCYB<br>A106*, T115**, I116*, N138**, V139**,<br>R211*, S213**, V223*, Y239**, T244**,<br>I264*, C328**, S374**, D481**, T501*,<br>V513*, V514**, W520**, Q544**                                                                                                                                | VcLCYB<br>A99*, T108**, I109*, N131**, V132**,<br>R204*, S206**, V216*, Y232**, T237**,<br>I257*, C321**, S467**, D464**, T494*,<br>V506*, V507**, L513**, Q537** |
| Ah  | 52 |                                                                                                                                                                                                                                                                                                                                                                                                                                                                                                                                                                    |   |              |        |   |           |                                                                                                                                                                                                                                                                                                                       |                                                                                                                                                                                                                                                                                                   |                                                                                                                                                                   |
| A1i | 51 |                                                                                                                                                                                                                                                                                                                                                                                                                                                                                                                                                                    | - | 33419.336472 |        |   |           |                                                                                                                                                                                                                                                                                                                       |                                                                                                                                                                                                                                                                                                   |                                                                                                                                                                   |
|     |    | <p>p<sub>0</sub>=0.80198, p<sub>1</sub>=0.11853,<br/>(p<sub>2a</sub>=0.06926, p<sub>2b</sub>=0.01024),<br/>ω<sub>0</sub>=0.07368, (ω<sub>1</sub>=1.00000), b:<br/>ω<sub>2a</sub>=0.07368, ω<sub>2b</sub>=1.00000, f:<br/><b>ω<sub>2a</sub>=999.00000, ω<sub>2b</sub>=999.00000</b></p>                                                                                                                                                                                                                                                                             | - | 33417.040223 | A1i/Ai | 1 | 4.5925*   | AtLCYB<br>L351*                                                                                                                                                                                                                                                                                                       | ZmLCYB<br>L358*                                                                                                                                                                                                                                                                                   | LsLCYB<br>T355*                                                                                                                                                   |
| Ai  | 52 |                                                                                                                                                                                                                                                                                                                                                                                                                                                                                                                                                                    |   |              |        |   |           |                                                                                                                                                                                                                                                                                                                       |                                                                                                                                                                                                                                                                                                   |                                                                                                                                                                   |

Selection analysis by three kinds of models is performed using Codeml implemented in PAML. *np*: number of free parameters. *lnL*: log



likelihood. LRT: likelihood ratio test. *df*: degrees of freedom.  $2\Delta\ln L$ : twice the log-likelihood difference of the models compared. The significant tests at 5% cutoff are labeled with \* and at 1% cutoff are labeled with \*\*. Sites of HILCYE detected in both branches B and H are showed in bold. Sites of HILCYB detected in both branches B and G are also showed in bold. G<sub>370</sub> of HILCYB and L<sub>457</sub> of HILCYE detected in branch B is highlighted by italic bold.
